# Supplementary material for: The Mutation of Rice MEDIATOR25, OsMED25, Induces Rice Bacterial Blight Resistance through Altering Jasmonate- and Auxin-Signaling
Source: MDPI journal article supplement (doi:10.3390/plants11121601), 2022-06-17
Supplement: s1 [file s1]

| Table S1. Sequences of gene-specific primers used for RT-qPCR |                                  |                           |                           |
|---------------------------------------------------------------|----------------------------------|---------------------------|---------------------------|
| Accession number                                              | Gene name                        | Sense primer (5'- 3')     | Antisense primer (5'- 3') |
| Os03g03500                                                    | Resistance protein               | GTAGCCCTACGTACATTTCTCG    | ATGCAGTATACACATCGGTTCTC   |
| Os10g08780                                                    | Lipid transfer protein           | GCCTACTGCCTCCAAGTTATG     | GGACAATGAGCAGTATACATCAGG  |
| Os07g48030                                                    | OsPrx112                         | GTAACGAGTTGCCATGCAAAG     | AGCACTTCACTTGGTTAACACGAC  |
| Os10g36100                                                    | Lipid transfer protein           | TTCTGCCAGTACGCGAAAG       | AGTTGGGAAAGGGGATGC        |
| Os10g40420                                                    | Lipid transfer protein           | TGTTAATTGCTTTCGGTGTCG     | TGTCACTCACTCAAGCACAGG     |
| Os02g50040                                                    | Beta-1,4-glucanase               | CGAATCGGGTGATTATTGC       | GCTGCAGTTAACTATACTTTGTTGG |
| Os10g05600                                                    | Thaumatococcus-like protein      | ATGTCGGCGCCATTGTAG        | CCCCTACAGTACAACAACAAAGC   |
| Os01g58730                                                    | Beta-1,3-glucanase               | GACGCTCCATGGATTG          | ATCAGAAATGCAGCGGAATC      |
| Os01g03320                                                    | Bowman-Birk proteinase inhibitor | GTGTGTTCTAGCTTGTTCGTATTCG | CACGCATACCAACATCAAACCAC   |
| Os01g71340                                                    | Beta-1,3-glucanase               | ACGAGACGGAGAGGCACTTC      | TCGATCCCTTCTCAGAACATCTTC  |
| Os01g03360                                                    | Bowman-Birk proteinase inhibitor | CGTTCGATCATTAGAGTTGG      | CCTCATGGTCCACACAAGC       |
| Os01g03310                                                    | Bowman-Birk proteinase inhibitor | TCTGCCGTGACTCCTTCAC       | CGATGAGCCTCTCTGCTTG       |
| Os10g02070                                                    | OsPrx126                         | GGCAACCAGCACAAAGAGCAG     | TCGTAGAAATCGTCGGATAACTG   |
| Os12g38170                                                    | Thaumatococcus                   | AATTACTCCGTTGGCCC         | GCGCACGTACAAACATAAGG      |
| Os02g14170                                                    | OsPrx26                          | ATCAGGCTCGGGAACATCG       | TATGAACAATTTGCGCGCGG      |
| Os03g31510                                                    | Proteinase inhibitor             | GTCGTGTACGAGCAGTCGTG      | AGGGAGGGATGGATCAGTG       |
| Os01g57610                                                    | OsGH3-1                          | CGGGAACAAGCAATGGAAC       | CAGATCATCACCTCTAGCTTCAA   |
| Os11g32520                                                    | OsGH3-13                         | TGTGTAATGTCAAACGTTGCTCAT  | TGATTCATAAAGAACTGCTCGTATT |
| Os01g08320                                                    | OsIAA1                           | GCGTGTGTCGTCAGGCTATATG    | ACTCCAAAGCAAGACCATCG      |
| Os06g50920                                                    | OsILA1                           | AAGAACACCAGCTGAACACC      | GTTCGTCAAGCAAGCAGCAA      |
| Os02g05060                                                    | OsSAUR5                          | GAAGGCAGAGGAGGAGTTGG      | CAAACACCTCAACATCACATGGA   |
| Os02g42990                                                    | OsSAUR11                         | ACGTGTCATGTGTGCTCGAT      | GCAAAGATGCGAACACGTTG      |
| Os08g35110                                                    | OsSAUR33                         | AGTGAAGAGTACGAAGCGGC      | ATTGGACCGATGGGCATGTT      |
| Os11g06390                                                    | Actin                            | GAGTATGATGAGTCGGGTCCAG    | ACACCAACAATCCCAACAGAG     |
