# Supplementary material for: The Mutation of Rice MEDIATOR25, OsMED25, Induces Rice Bacterial Blight Resistance through Altering Jasmonate- and Auxin-Signaling
Source: MDPI journal article supplement (doi:10.3390/plants11121601), 2022-06-17
Supplement: s1 [file s1]

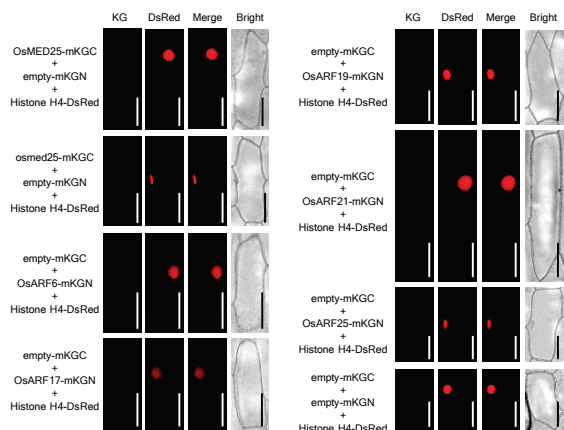

**Figure S1.** BiFC experiments using empty vectors as negative controls in plant cells. From left to right, the images shown are: KG, fluorescence images of KG protein; DsRed, fluorescence images of DsRed protein; Merge, overlap KG images and DsRed images; Bright, light-microscopy images. Scale bars = 100 μm.
